# Supplementary material
Source: PubMed Central journal article supplement (PMC4631644)
Supplement: NIHMS727590-supplement.pdf [file NIHMS727590-supplement.pdf]

# Information in Pallidal Neurons Increases with Parkinsonian Severity

Alan D. Dorval, Abirami Muralidharan, Alicia L. Jensen, Kenneth B. Baker, and Jerrold L. Vitek

## Supplement

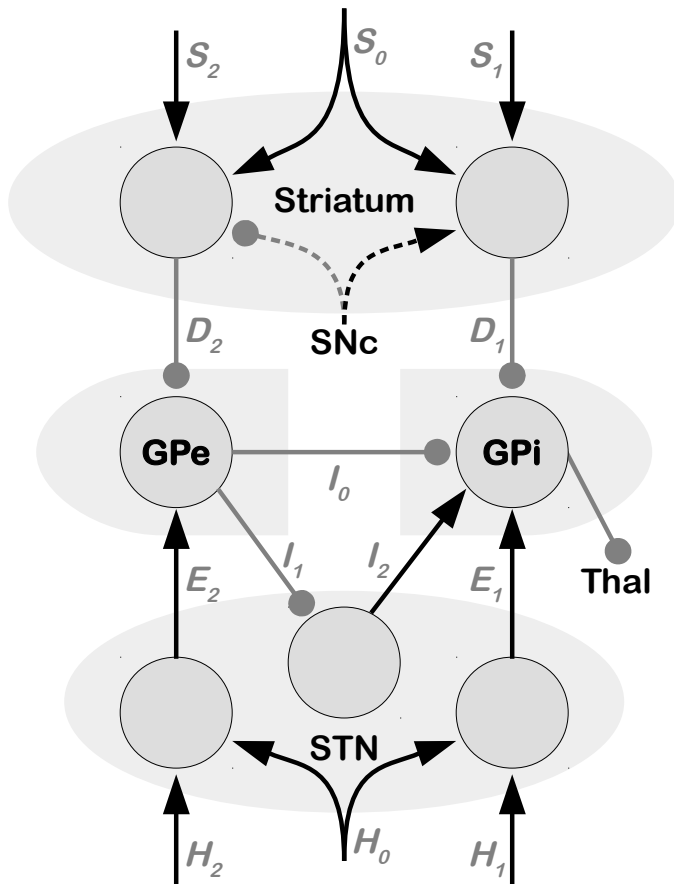

**Figure S1.** Diagram of conceptually distinct connections in four basal ganglia nuclei: striatum, GPe, GPi and STN. Solid black arrows depict glutamatergic, excitatory projections; solid grey circles depict gabaergic, inhibitory projections; dashed lines depict dopaminergic projections from SNc that can be excitatory (*black*) or inhibitory (*grey*) depending on dopamine receptor type ( $D_1$  or  $D_2$ ). Striatal input arrives from cortex through 3 conceptually distinct channels:  $S_1$  drives the direct pathway,  $S_2$  drives the indirect pathway, and  $S_0$  represents cortico-striatal information common to both. Cortico-subthalamic signals through the hyperdirect pathway are divided into 3 analogous channels –  $H_1$ ,  $H_2$ , and  $H_0$ , respectively – that drive GPi and GPe through  $E_1$  and  $E_2$  respectively. Information sent from GPe to GPi can transit  $I_0$ , or route through STN via  $I_1$  and  $I_2$ . Processing performed by this network affects behavior via GPi efferents to thalamus.
